# Supplementary material
Source: PubMed Central journal article supplement (PMC4365996)
Supplement: NIHMS577358-supplement-01.pdf [file NIHMS577358-supplement-01.pdf]

**Table S1, Related to Experimental Procedures. Parameters used in the model.**

| Parameter     | Description                                                                                         | Value                 | Value               |
|---------------|-----------------------------------------------------------------------------------------------------|-----------------------|---------------------|
|               |                                                                                                     | (leading end)         | (trailing end)      |
| $h$           | Thickness of cortical layer, $nm$                                                                   | 100                   |                     |
| $E_c$         | Elastic constant of the cortical layer, $kPa$                                                       | 6                     |                     |
| $b$           | Width of the narrow channel, $\mu m$                                                                | 3                     |                     |
| $D$           | Diffusivity of ions, $\mu m^2 / s$                                                                  | 500                   |                     |
| $\eta$        | Viscosity of the cytoplasm, $Pa \cdot s$                                                            | 0.001                 |                     |
| $\xi_w$       | Friction coefficient between the cell and the channel wall, $Pa \cdot s / m$                        | $8 \times 10^8$       |                     |
| $\Pi_{out}$   | Osmotic pressure outside the cell, $MPa$                                                            | 0.88                  |                     |
| $\sigma_a$    | Active stress inside the cortex, $Pa$                                                               | -100                  |                     |
| $m$           | The integer in the constitutive law                                                                 | 4                     |                     |
| $\sigma_c$    | Threshold stress of MS channel, $Pa$                                                                | 900                   | 300                 |
| $\sigma_s$    | Saturating stress of MS channel, $Pa$                                                               | 2700                  | 900                 |
| $\Delta\Pi_c$ | Critical osmotic pressure difference of ion pump, $GPa$                                             | $6000\Pi_{out,f}$     | $6000\Pi_{out,b}$   |
| $\alpha$      | Rate constant of water transport, $m \cdot Pa^{-1} \cdot s^{-1}$                                    | $10^{-12}$            | $10^{-12}$          |
| $\beta$       | Rate constant of ion flux across MS channels, $mol \cdot m^{-2} \cdot Pa^{-1} \cdot s^{-1}$         | $5 \times 10^{-6}$    | $5 \times 10^{-6}$  |
| $\gamma$      | Rate constant of ion flux across ion transporters,<br>$mol \cdot m^{-2} \cdot Pa^{-1} \cdot s^{-1}$ | $5.1 \times 10^{-13}$ | $5 \times 10^{-13}$ |
